# Supplementary material
Source: MDPI journal article supplement (https://www.mdpi.com/2075-163X/10/7/618)
Supplement: s1 [file s1]

## Sheet: S1-Whole rock
Table S1. Major (wt%) and trace elements (ppm) compositions of various leucosomes and melanosomes in stromatic migmatites in the NDZ.
Type	Grt-bearing leucosome			Amp-rich leucosome							Amp-poor leucosome				Kfs-bearing leucosome			Melanosome			Melanosome									Leucocratic migmatite		Melanocratic migmatite
Sample	1310YZH1-1	1310YZH6-1	1512LTSP4	1410BJ1-4	1410BJ2-2	1410MSH1-2	1410MSH2-3	1410YZH1	1410YZH3	1505LNA2-1	1310YZH6-2	1310YZH6-3	1410BJ1-1	1410LTSP2	1310YZH2-2	1310YZH7-4	1410MSH1-3	1310YZH1-3	1310YZH2-1	1310YZH3	1310YZH4	1310YZH7-1	1310YZH7-2	1310YZH7-3	1410MSH2-4	1505LNA2-2	1505XPG3-1	1505MSH1	1512LTSP1	1410MSH1-1	1410MSH2-2	1310YZH1-2	1410BJ1-2	1410BJ1-3	1410BJ2-1	1410MSH2-1	1410YZH2	1410LTSP1
SiO2	69.58	72.84	74.43	70.61	72.68	72.65	76.82	77.23	65.9	70.88	75.39	71.28	72.96	69.75	72.83	74.96	73.67	52.67	59.13	53.92	54.48	47.24	58.87	49.42	64.38	67.68	55.49	60.64	53.41	72.98	75.61	59.55	71.14	67.35	68.9	66.5	66.68	60.01
Al2O3	9.59	13.54	12.86	13.4	14.34	14.16	12.71	11.4	14.98	16.06	12.99	15.65	13.98	16.1	14.67	14.03	14.72	18.35	15.68	16.25	15.72	6.06	12.16	21.55	14.91	14.94	14.52	17.8	17.34	13.96	12.82	15.15	13.79	14.43	14.06	14.77	14.84	19.43
TiO2	0.34	0.27	0.28	0.49	0.24	0.31	0.28	0.12	0.66	0.19	0.14	0.24	0.26	0.27	0.14	0.07	0.05	1.08	1.64	1.35	1	0.84	0.54	0.58	0.63	0.53	1.1	0.85	1.19	0.3	0.27	1.19	0.5	0.41	0.7	0.54	0.67	0.49
Fe2O3	5.62	1.12	1.17	1.07	0.85	1.11	0.75	1.57	2.19	0.51	0.59	0.45	0.94	0.22	0.04	0.16	0.64	1.72	3.13	3.29	2.87	4.7	1.22	2.18	2.33	1.9	3.63	2.51	1.99	0.98	0.81	2.98	1.05	1.18	1.21	2.14	2.05	1.91
FeO	7.4	1.08	1.05	2.11	0.76	1.13	0.78	0.84	2.93	0.58	0.69	0.74	1.73	1.18	0.5	0.26	0.35	4.96	4.57	5.92	5.48	7.3	3.83	4.77	3.34	2.12	5.9	2.34	6.66	1.36	0.96	5.34	2.18	2.13	2.95	2.71	2.32	2.54
CaO	2.44	1.28	1.07	2.46	1.62	3.26	1.48	0.73	3.13	1.59	0.7	1.5	2.04	1.47	1.46	1.61	1.66	7.74	5.43	6.29	7.72	10.05	15.4	12.5	4.79	2.95	6.34	3.46	6.59	2.45	1.63	4.12	2.79	3.08	3.58	4.22	3.1	2.93
MgO	0.73	0.37	0.31	1.54	0.41	0.9	0.34	0.13	1.97	0.3	0.16	0.34	0.47	0.43	0.23	0.12	0.09	4.63	2.58	4.1	5.3	19.21	3.33	3.38	2.55	1.84	5.3	1.72	3.95	0.79	0.43	2.29	1.47	2.11	1.87	2.25	1.95	1.01
K2O	1.54	5.35	5.65	3.81	5.11	1.24	1.32	4.61	2.8	4.25	5.64	4.54	2.54	6.14	6.32	4.31	4.38	2.9	2.29	2.98	1.47	0.5	0.54	0.77	1.23	2.12	1.52	3	3.05	1.9	2.85	4.17	1.7	4.61	1.82	1.22	2.63	4.54
Na2O	1.19	3.26	2.47	3.45	3.37	4.55	5.02	2.9	4.31	5.01	3.13	4.53	4.39	3.45	2.88	3.7	3.84	3.66	4.05	3.5	3.84	1.03	2	3.41	4.65	4.95	4.39	6.08	3.94	4.41	3.86	3.2	4.45	3.45	4.05	4.7	4.66	5.6
MnO	0.33	0.05	0.07	0.08	0.02	0.03	0.07	0.04	0.1	0.01	0.04	0.04	0.03	0	0.03	0.03	0	0.12	0.13	0.15	0.14	0.19	0.13	0.11	0.14	0.09	0.18	0.15	0.13	0.03	0.02	0.14	0.1	0.11	0.09	0.14	0.1	0.13
P2O5	0.05	0.06	0.04	0.11	0.07	0.06	0.01	0.01	0.2	0.06	0.03	0.08	0.04	0.09	0.01	0.01	0.02	0.13	0.46	0.52	0.24	0.12	0.14	0.07	0.18	0.16	0.23	0.35	0.36	0.06	0.04	0.32	0.1	0.08	0.13	0.1	0.21	0.19
LOI	0.99	0.48	0.38	0.6	0.33	0.39	0.27	0.12	0.6	0.27	0.28	0.23	0.44	0.41	0.35	0.31	0.19	1.81	0.66	1.3	1.46	2.4	1.66	1.12	0.73	0.54	1.22	0.84	1.19	0.57	0.41	1.16	0.59	0.7	0.54	0.56	0.52	0.76
A/CNK	1.64	1.1	1.15	1.11	1.14	1.2	1.15	1.09	1.16	1.12	1.09	1.14	1.18	1.18	1.14	1.15	1.17	1.13	1.11	1.1	1.05	0.53	0.68	1.21	1.12	1.14	1	1.09	1.1	1.21	1.17	1.12	1.18	1.07	1.18	1.15	1.11	1.16
A/NK	2.65	1.21	1.26	1.37	1.3	1.6	1.31	1.17	1.48	1.25	1.15	1.26	1.4	1.31	1.27	1.3	1.33	2	1.72	1.81	1.99	2.71	3.15	3.34	1.66	1.43	1.64	1.34	1.77	1.5	1.36	1.55	1.51	1.35	1.63	1.63	1.41	1.37
TFeO	12.45	2.09	2.1	3.07	1.53	2.13	1.45	2.25	4.9	1.05	1.22	1.15	2.57	1.38	0.54	0.41	0.92	6.5	7.39	8.87	8.07	11.54	4.93	6.72	5.44	3.83	9.17	4.59	8.45	2.25	1.69	8.02	3.12	3.19	4.04	4.64	4.16	4.27
Y	125	27. 9	40.6	34.7	18.1	8.91	3.97	8.27	48.6	5.26	3.03	2.96	4.27	5.1	0.39	1.34	0.49	10.9	38.6	30	21.2	16.8	22.7	15.8	32.5	16.7	95.8	44.1	22.9	2.3	3.6	46.2	32.6	30.3	24.4	21.1	32.5	27.1
La	117	99	96.4	15.6	60.4	17.4	9.3	45.7	38.8	16.2	21.7	21.9	39.8	35.2	2.7	3.1	4.67	9.6	46.4	69.8	29.8	10.4	42.7	10.2	22.9	10	41.9	76.7	61.5	14	24.2	119	29.7	7.5	8.41	20.2	45.4	86.5
Ce	200	196	205	39.7	121	34.4	22.6	102	87.2	32.3	43.6	43.4	79.1	88.8	4.32	5.18	8.52	21	100	148	61	26.9	75.4	22.5	49.8	25.5	100	162	104	25	54.3	243	63.4	23.5	21.2	39	90.3	204
Pr	19.8	21.7	22.2	5.15	12.6	4.01	3.09	12.1	10.7	3.94	5.13	5.03	8.47	10.1	0.4	0.53	0.77	2.93	12.9	18.2	7.63	4.11	8.48	3.06	6.23	3.98	15.2	19.5	13.1	2.64	6.42	27.6	7.57	3.63	3.09	4.7	11.4	22
Nd	63.2	74	69.6	23.4	45.4	16.4	14.7	49.8	45.7	13.9	18.2	18.1	32.4	39.7	1.19	1.67	2.63	12.6	51.7	69.3	29.4	19	30.4	13.4	28.7	17.1	67.5	71.2	43.9	10	26.6	99.2	31.2	18	15.3	20.9	47.1	85.7
Sm	12.2	11.5	12	5.09	6.6	2.78	2.61	8.21	8.77	1.83	2.79	2.76	4.01	5.13	0.13	0.21	0.32	2.76	10.6	12.6	5.63	4.51	5.65	3.16	5.58	3.15	15.4	11.1	7.85	1.35	3.53	16.7	5.68	4.24	3.47	4.05	7.87	12.5
Eu	1.11	1.32	1.43	1.22	1.19	1.16	1.59	1.75	2.19	0.7	0.83	0.88	1.45	1.36	0.67	0.93	0.81	1.45	2.51	2.73	1.45	1.21	1.25	0.91	1.64	0.67	2.47	1.99	2.28	0.82	1.34	2.73	1.57	1.19	1.01	1.48	1.88	3.06
Gd	14.8	9.6	11.4	3.65	6.92	2.28	1.88	6.66	6.95	1.44	2.17	1.91	4.24	4.85	0.14	0.17	0.38	2.38	9.16	10	4.79	3.81	4.58	2.91	4.37	2.49	13.9	9.22	6.64	1.36	3.25	14.5	4.72	2.83	2.4	3.16	6.42	10.6
Tb	2.98	1.18	1.62	0.84	0.86	0.33	0.27	0.85	1.38	0.2	0.22	0.16	0.42	0.54	0.01	0.02	0.04	0.38	1.38	1.32	0.75	0.62	0.65	0.52	0.9	0.49	2.98	1.63	1	0.17	0.36	1.93	0.91	0.71	0.62	0.65	1.11	1.52
Dy	21.8	5.99	8.55	5.9	3.58	1.77	1.04	2.62	8.49	0.83	0.87	0.6	1.09	1.49	0.06	0.14	0.12	2.28	7.87	6.76	4.25	3.93	3.97	3.28	5.83	2.5	15.4	7.36	4.87	0.51	1	10.4	5.64	5.07	4.37	3.93	6.1	6.85
Ho	4.63	1.09	1.66	1.29	0.67	0.34	0.18	0.41	1.81	0.2	0.13	0.1	0.19	0.22	0.01	0.03	0.02	0.42	1.55	1.22	0.87	0.75	0.81	0.66	1.21	0.66	3.71	1.7	0.95	0.09	0.16	1.92	1.22	1.12	0.95	0.81	1.23	1.18
Er	13.7	2.86	5.23	3.26	1.81	0.94	0.49	1.15	4.71	0.55	0.32	0.29	0.64	0.72	0.03	0.15	0.07	1.17	4.14	3.17	2.36	1.97	2.44	1.86	3.05	1.85	9.6	4.25	3.07	0.27	0.56	5.14	3.24	2.77	2.43	1.99	3.23	3
Tm	2.49	0.42	0.82	0.72	0.3	0.2	0.07	0.13	1.01	0.09	0.03	0.04	0.07	0.05	0.01	0.03	0.01	0.19	0.67	0.48	0.39	0.31	0.45	0.3	0.65	0.34	1.64	0.67	0.42	0.03	0.05	0.79	0.71	0.64	0.54	0.41	0.64	0.45
Yb	16.2	2.4	4.99	4.11	1.78	1.12	0.38	0.84	5.51	0.58	0.19	0.24	0.42	0.28	0.03	0.2	0.07	1.22	4.05	2.81	2.36	1.87	3.1	1.88	3.7	2.2	10.2	3.92	2.65	0.18	0.29	4.8	4.05	3.76	2.92	2.44	3.69	2.45
Lu	2.31	0.36	0.66	0.57	0.28	0.17	0.06	0.14	0.77	0.09	0.04	0.05	0.07	0.05	0.01	0.15	0.01	0.22	0.62	0.45	0.41	0.36	0.52	0.31	0.53	0.29	1.39	0.51	0.37	0.03	0.06	0.76	0.56	0.54	0.41	0.34	0.52	0.37
Li	6.19	7.38	2.65	20.3	6.47	3.67	5.25	3.68	7.63	3.98	4.32	11.8	14.4	4.61	3.14	3.23	1.72	5.14	4.98	9.32	10.1	3.48	8.14	9.24	7.69	8.02	28.8	6.67	8.5	7.66	6.44	7.29	21.8	14.8	19.2	7.84	7.2	5.88
Be	0.29	2.26	0.73	2.19	3.12	1.67	1.05	0.57	2.81	1.53	1.03	3.12	1.56	0.74	1.04	1.87	1.03	1.42	2.41	2.16	1.72	0.52	4.79	1.06	1.28	1.86	5.83	2.83	1.92	1.48	0.88	1.6	1.7	1.65	2.58	1.81	2.11	1.3
Sc	11.1	4.45	5.4	9.94	3.14	3.21	6.02	1.77	11.6	2.42	2.87	3.34	2.79	2.9	2.75	2.36	1.05	25.9	19.9	21.8	28.1	47.4	15.3	28.4	17.6	10.5	33.7	8.45	16.7	2.07	2.54	18.6	10.5	12.5	14	16.1	8.78	5.17
V	57.8	58.3	47.8	67.2	24.3	33.1	15.1	10.8	69.6	34.6	52	63.5	34.2	21.8	59	47	18.2	226	198	228	227	222	140	193	123	69	169	64.2	139	28.7	18.8	129	57.6	68.9	92.1	114	68.1	25.4
Cr	20.8	22	7.12	24.5	7.1	2.4	2.42	2.56	34.9	5.63	19.1	19.5	6.83	3.29	18.4	16.7	2.15	264	35.1	59.3	226	1531	113	155	28.4	31	216	7.07	32.6	2.93	2.5	56.4	25.4	24.4	36.8	24.8	24.9	3.2
Co	13.4	2.89	3.87	11.7	2.11	5.57	1.26	1.53	17.6	2.46	1.23	2.3	5.57	2.56	1.93	2.19	0.6	26.4	23.6	28.9	31.8	104	22.9	26.2	16.1	10.2	33.6	10.1	22.6	3.85	1.88	16.7	8.12	11.4	11.3	15.5	11.1	4.25
Ni	2.54	2.44	3.39	13.5	2.43	4.21	12.2	1.47	23.6	2.44	1.79	2.01	4.61	1.88	1.75	1.67	1.06	32.4	14.5	17.4	50.4	508	45.9	44.9	10.8	15.5	80	4.65	13.5	2.33	1.15	5.91	12.7	16.8	14.1	8.38	12.5	1.99
Cu	35	8.24	18.1	47.3	4.1	15.8	11.6	2.19	36.5	4.07	7.06	7.98	71.7	4.85	7.11	19.3	2.19	13.4	38.2	122	27.6	163	19.7	33	8.24	10.6	22.1	24.1	16	14.4	6.15	24.5	33.8	22.4	14.7	25.8	15.5	7.86
Zn	97.4	40.6	21.5	60.5	25.8	25.6	48.6	28.4	99.4	29.6	23.2	53.8	47.6	34.2	15.6	11.7	4.49	71.1	102	123	89.2	87.9	168	72.1	84.4	124	229	128	110	39.4	32.1	129	71.9	65.8	75.2	88.7	87.2	80.8
Ga	15.6	19.9	19.5	18.4	19.2	14.3	17.2	18.3	23.3	24.8	19.9	29.2	21.3	18	17.7	19.5	14.7	18.7	23.9	22.1	20	8.59	19.4	21.2	18.5	20	36.8	26.7	24.4	15.8	15.5	25.9	18	20.3	20.4	20	20.6	23.6
Rb	31.4	127	111	95	119	10.2	12.7	67.1	70.4	49.8	107	93.8	67.7	97.9	95.1	75.6	52.5	107	46.7	74.1	34.2	5.58	25.9	9.93	14.9	34.9	56.4	54.9	45.8	30.2	36.8	94.1	51	94.3	61	18.8	42.2	48.8
Sr	118	277	311	309	254	699	210	215	298	643	235	742	274	798	599	609	581	564	345	820	596	157	473	478	359	415	484	736	515	497	334	423	241	381	158	350	369	406
Zr	510	299	407	152	182	157	252	1066	201	88.2	134	145	327	227	31.3	156	142	48.7	237	286	129	50.7	152	71.2	114	109	91.6	364	280	92.6	227	563	193	89.8	168	181	219	487
Nb	8.39	16.7	19.9	10.9	16.1	5.08	3.88	0.82	15.4	3.73	1.14	6.42	2.5	3.55	1.98	0.66	0.53	9.3	24.76	15.89	8.09	3.6	23.4	5.13	4.9	6.45	26.1	21.8	18.2	2.33	2.13	33.7	6.94	8.36	11	4.05	12.8	11.8
Mo	10.4	0.32	1.37	0.67	0.56	0.13	0.1	0.11	0.35	0.09	0.05	0.07	0.99	0.04	0.1	0.12	0.02	0.28	0.52	0.48	0.38	0.26	4.73	0.37	0.26	0.19	0.41	0.3	0.58	0.04	0.08	3.67	0.61	1.03	0.54	0.17	0.21	0.08
Cs	0.28	0.26	0.31	1.21	1.17	0.29	0.19	0.18	0.68	0.1	0.19	0.38	0.97	0.3	0.51	0.47	0.22	0.56	0.42	0.95	0.34	0.12	0.58	0.65	0.26	0.5	0.82	0.37	0.53	0.41	0.2	0.72	0.85	0.79	1.27	0.21	0.66	1.13
Ba	634	1409	1328	1633	1099	579	602	1251	1278	2029	1155	1765	966	3123	3088	2237	2433	559	959	1569	719	192	286	231	692	832	404	1244	991	921	1585	1541	699	2453	246	595	1115	2686
Hf	19.8	19.8	13.8	9.63	5.36	8	9.26	21.6	9.59	4.02	4.85	6.07	8.87	7.32	0.61	4.96	5.79	1.6	10.1	14.6	5.79	1.8	5.78	2.28	4.74	5.03	5.65	16.3	10.5	2.85	8.68	22.7	9.21	6.02	9.24	7.21	10.8	24.1
Ta	0.27	0.88	1.15	0.81	1.21	0.4	0.15	0.11	0.71	0.26	0.06	0.19	0.15	0.13	0.18	0.06	0.11	0.69	1.19	0.58	0.4	0.17	1.14	0.39	0.28	0.39	1.34	0.73	0.89	0.09	0.12	1.24	0.37	0.45	0.82	0.21	0.56	0.31
W	0.42	0.09	0.13	0.22	0.14	0.19	0.05	0.2	0.3	0.04	0.06	0.05	0.58	0.04	0.08	0.06	0.1	0.54	0.14	0.22	0.17	0.15	1.86	0.29	0.14	0.06	0.24	0.08	0.21	0.17	0.08	0.18	0.23	0.36	0.62	0.09	0.15	0.2
Pb	6.75	30.3	19.7	24.7	31.1	10.3	10.9	34.7	25.2	26	33.8	39.9	19.8	22.4	28.5	24.4	23.7	9.86	12.4	13	13.4	2.38	12.7	22.9	10.9	15.1	17.4	28.1	12.4	13.2	17.8	14.3	13.7	27.8	11.6	11.7	20.6	28.3
Th	50.6	13.3	27.9	5.53	30.9	4.23	2.02	10.7	9.71	1.22	3.27	5.04	6.2	10	1.05	0.24	0.56	1	3.7	7.16	2.59	0.71	9.91	1.69	1.18	0.83	0.81	7.01	10.5	1.39	5.05	22.8	3.36	3.35	0.59	1.17	5.84	4.27
U	3.98	0.44	2.39	1.56	3.5	0.61	0.04	0.22	0.53	0.11	0.07	0.24	0.43	0.54	0.19	1.05	0.06	0.75	0.36	0.73	0.32	0.13	3.68	1.07	0.22	0.32	0.39	0.1	1.07	0.05	0.07	2.57	0.13	1.03	0.22	0.13	0.41	0.23
δEu	0.25	0.39	0.37	0.87	0.54	1.41	2.19	0.72	0.86	1.33	1.03	1.17	1.07	0.83	15.54	14.74	7.04	1.73	0.78	0.74	0.85	0.89	0.75	0.92	1.01	0.73	0.52	0.6	0.96	1.86	1.21	0.53	0.93	1.05	1.07	1.27	0.81	0.82
Note: A/CNK and A/NK were calculated as A/CNK = Al/(Ca + Na + K) and A/NK = Al/(Na + K) on molar basis; δEu = Eu/Eu* = EuN/(SmN*GdN)1/2

## Sheet: S2-SHRIMP U-Pb
Table S2. SHRIMP zircon U-Pb data for Grt-bearing, Amp-rich and Amp-poor leucosomes from the NDZ.
Spot No.	Domain	206Pbc	U	Th	Th/U	206Pb*	207Pb/206Pb	1σ	207Pb/235U	1σ	206Pb/238U	1σ	206Pb/238U age (Ma)	1σ
		(%)	ppm	ppm		ppm		%		%		%
1310YZH1-1 (Grt-bearing leucosome)
1.1	C	0.3	441	32	0.08	32	0.0568	1.7	0.653	1.8	0.08334	0.7	517	3
2.1	M	0.79	289	6	0.02	9	0.0559	3	0.2855	3.2	0.03707	1.2	234	3
3.1	R	0	3567	66	0.02	62	0.04774	1.1	0.133	1.1	0.0202	0.4	129	1
4.1	C	0.03	1002	138	0.14	114	0.06528	1	1.195	1.1	0.13278	0.4	804	3
5.1	C	0.49	234	212	0.94	27	0.06827	1.5	1.251	1.7	0.1329	0.9	802	7
5.2	R	0	290	4	0.02	6	0.0443	4.7	0.1435	5	0.02349	1.4	151	2
6.1	C	0.13	1262	24	0.02	57	0.05245	1.3	0.3803	1.4	0.05258	0.5	330	2
7.1	C	0.07	1211	133	0.11	137	0.06689	0.7	1.212	0.8	0.13137	0.4	795	3
8.1	C	0.06	1598	774	0.5	175	0.06476	0.6	1.1394	0.7	0.1276	0.4	775	3
8.2	R	0.19	563	23	0.04	10	0.0472	3	0.1336	3.1	0.02051	1	131	1
8.3	C	0.4	463	164	0.37	35	0.06314	1.4	0.753	1.6	0.08646	0.7	533	4
9.1	C	0.07	1034	53	0.05	66	0.05557	1	0.5683	1.2	0.07417	0.5	461	2
10.1	R	3.47	146	2	0.02	3	0.0522	8.6	0.149	8.7	0.02072	1.4	132	3
11.1	M	0.47	461	13	0.03	15	0.0525	2.3	0.2669	2.5	0.03685	0.9	233	2
12.1	R	1.76	923	15	0.02	17	0.0485	6.4	0.1382	6.5	0.02069	0.8	132	1
13.1	R	0.25	1219	20	0.02	21	0.04859	1.9	0.1365	2	0.02038	0.7	130	1
14.1	R	1.22	326	2	0.01	6	0.0492	4.3	0.1386	4.5	0.02041	1.3	130	2
15.1	R	0	200	2	0.01	4	0.0481	4.2	0.1352	4.4	0.0204	1.3	131	2
16.1	C	0.06	1053	411	0.4	121	0.0662	0.7	1.221	0.9	0.13375	0.5	809	4
17.1	R	0.46	970	17	0.02	17	0.0494	3.4	0.1405	3.6	0.02065	0.8	132	1
18.1	C	0.21	249	93	0.38	30	0.0677	3.1	1.289	3.2	0.1381	0.9	833	7
1310YZH6-1 (Grt-bearing leucosome)
1.1	C	0.21	245	214	0.9	28	0.0685	1.5	1.247	1.9	0.132	1.3	796	10
2.1	R	0	876	306	0.36	15	0.0463	2.6	0.1266	2.7	0.01984	0.7	127	1
3.1	M	0.86	80	0	0	2	0.0514	6.6	0.231	6.9	0.03266	1.8	207	4
4.1	R	9.31	143	34	0.24	3	0.047	27.7	0.133	27.1	0.02039	1.5	132	4
5.1	C	0.06	705	363	0.53	78	0.06605	0.9	1.171	1	0.12858	0.5	779	4
5.2	C	0.29	136	213	1.62	14	0.0619	2.4	1	2.6	0.1172	0.9	718	7
6.1	R	5.99	111	41	0.38	2	0.044	20.9	0.119	21	0.0196	1.6	125	4
7.1	R	0	197	103	0.54	3	0.054	4.3	0.1536	4.6	0.02064	1.3	132	2
8.1	C	0.16	348	153	0.45	40	0.06581	1.2	1.204	1.3	0.13271	0.6	803	5
9.1	C	1.18	102	83	0.84	4	0.0667	3.9	0.438	4.1	0.04766	1.3	295	4
10.1	C	0.62	235	323	1.42	19	0.0466	5.2	0.604	5.1	0.09399	0.8	587	5
11.1	C	0.97	82	31	0.39	5	0.0485	6.4	0.459	6.5	0.06852	1.4	432	6
12.1	C	0.11	624	812	1.35	57	0.048	4.4	0.684	4.2	0.10336	0.5	645	3
13.1	R	0.95	166	82	0.51	3	0.0527	5.1	0.1432	5.2	0.0197	1.4	125	2
14.1	R	0.68	141	64	0.47	2	0.0391	8.2	0.1046	8.3	0.01941	1.5	125	2
15.1	R	0.35	486	163	0.35	8	0.0491	2.9	0.1343	2.9	0.01986	0.8	127	1
16.1	C	0.04	760	478	0.65	86	0.06558	0.7	1.188	0.8	0.13139	0.4	795	3
17.1	M	0.5	808	4	0	23	0.05193	1.9	0.2367	2	0.03305	0.5	209	1
1410BJ1-4 (Amp-rich leucosome)
1.1	R2	0	389	186	0.49	7	0.0508	2.7	0.1398	2.9	0.01994	1	127	1
2.1	R2	0.4	420	200	0.49	7	0.0489	2.7	0.1339	2.9	0.01986	1	126	1
3.1	R2	0.76	309	116	0.39	5	0.0509	5.5	0.1429	5.6	0.02036	1	130	2
4.1	M	0.11	854	20	0.02	25	0.05073	1.4	0.2363	1.6	0.03378	0.8	214	2
5.1	R2	0.44	422	45	0.11	7	0.0505	2.8	0.1409	2.9	0.02024	1	129	1
6.1	C	0	53	78	1.54	16	0.1337	1.1	6.63	1.7	0.3595	1.3	1967	23
6.2	R1	0.3	423	59	0.14	8	0.0464	3.9	0.1433	4	0.02241	1.1	143	2
7.1	R2	0.53	287	100	0.36	5	0.045	3.7	0.1248	3.9	0.02011	1	129	1
9.1	R2	0.26	413	99	0.25	7	0.0465	2.9	0.1276	3	0.0199	1	127	1
10.1	M	0.87	147	22	0.15	4	0.0467	5	0.191	5.2	0.02964	1.4	188	3
11.1	M	0.09	1374	17	0.01	38	0.0494	2.4	0.2187	2.5	0.03209	0.8	204	2
12.1	R3	3.74	1117	93	0.09	17	0.0346	5.7	0.0788	5.8	0.01654	1	108	2
13.1	C	0.35	151	3	0.02	6	0.0491	3.3	0.303	3.7	0.04479	1.5	283	4
13.2	R1	0.22	717	37	0.05	14	0.04603	2.2	0.1408	2.4	0.02219	1	142	1
15.1	M	1.12	216	2	0.01	7	0.0487	3.9	0.234	4.4	0.03485	2.1	221	5
16.1	C	0.66	202	14	0.07	7	0.0395	4.5	0.21	5	0.03852	2.2	247	6
17.1	C	0.58	145	10	0.07	5	0.036	5.3	0.199	5.5	0.04009	1.4	257	4
17.2	R2	0.4	335	151	0.47	6	0.0436	3.8	0.1205	4	0.02007	1.1	129	2
1410BJ1-1 (Amp-poor leucosome)
1.1	C	0.27	364	3	0.01	10	0.0502	2.4	0.229	2.5	0.03311	1	210	2
2.1	C	0.26	365	4	0.01	11	0.0534	2.2	0.251	2.4	0.03409	1	216	2
3.1	C	0.17	391	6	0.02	11	0.0493	2.2	0.2272	2.5	0.03343	1	212	2
4.1	R1	0.45	236	13	0.06	4	0.051	3.5	0.1521	3.8	0.02162	1.2	138	2
5.1	C	0.18	494	8	0.02	14	0.0522	1.9	0.2434	2.1	0.03382	0.9	214	2
6.1	R2	0.73	98	54	0.57	2	0.0514	5.6	0.1494	6	0.02108	1.6	134	2
7.1	C	0	550	7	0.01	16	0.04872	1.9	0.2265	2.1	0.03371	0.9	214	2
8.1	C	0.15	399	2	0.01	11	0.0518	2.1	0.2361	2.4	0.03306	1	210	2
9.1	C2	0.26	490	5	0.01	14	0.0521	1.9	0.234	2.2	0.03254	1	206	2
10.1	C	0.11	465	4	0.01	14	0.0515	1.9	0.2418	2.2	0.03405	1	216	2
11.1	C	0.15	416	4	0.01	12	0.0525	2.1	0.2432	2.3	0.03362	1	213	2
12.1	R2	0	152	105	0.71	3	0.0509	4.5	0.144	4.8	0.02052	1.4	131	2
12.2	R2	0.48	102	58	0.59	2	0.0489	6.1	0.1403	6.3	0.02083	1.5	133	2
13.1	C	0.13	355	2	0.01	10	0.0512	2.3	0.2352	2.6	0.03334	1	211	2
14.1	C	1.12	83	0	0	2	0.0516	5	0.246	5.3	0.0346	1.5	218	3
15.1	R2	0	119	68	0.59	2	0.0491	6.5	0.1378	6.7	0.02034	1.5	132	2
16.1	C	0.22	308	28	0.09	9	0.0524	2.5	0.2437	2.7	0.03372	1.1	214	2
17.1	C	0.23	147	16	0.11	4	0.0502	3.6	0.2332	3.9	0.0337	1.3	214	3
1310YZH6-3 (Amp-poor leucosome)
1.1	C	2.09	490	201	0.42	9	0.0385	13.5	0.104	13.5	0.0196	1	128	2
2.1	C	0	166	67	0.42	3	0.0491	5.7	0.1354	5.8	0.01999	1.3	129	2
3.1	C	0.05	3849	114	0.03	66	0.04768	0.9	0.1314	1	0.02	0.3	128	0
4.1	C	1.38	239	48	0.21	4	0.0531	3.6	0.1467	3.8	0.02004	1.2	126	2
4.2	C	0.19	7382	172	0.02	126	0.04857	1	0.133	1.1	0.01986	0.4	127	0
7.1	C	1.65	626	124	0.2	11	0.0482	2.7	0.1343	2.8	0.02019	0.9	127	1
9.1	C	0.24	1013	169	0.17	18	0.04935	1.8	0.1374	2	0.0202	0.6	129	1
10.1	C	3.72	112	47	0.44	2	0.051	25.5	0.137	26.3	0.01957	1.5	127	3
11.1	C	0.17	3809	159	0.04	65	0.04819	0.9	0.1314	1	0.01978	0.4	126	0
12.1	C	0.66	220	46	0.22	4	0.0435	4.6	0.118	4.7	0.01966	1.1	125	2
13.1	C	0.71	893	160	0.19	15	0.0507	2.2	0.1386	2.2	0.01982	0.7	126	1
14.1	C	0.37	641	120	0.19	11	0.0484	2.7	0.1333	2.9	0.01999	0.9	128	1
15.1	C	0.27	722	156	0.22	12	0.0482	2.5	0.1312	2.5	0.01975	0.8	126	1
16.1	C	-0.26	837	234	0.29	14	0.0496	2	0.1373	2.2	0.02007	0.7	129	1
Pbc: common lead portion; Pb*: radiogenic lead portion; C: core; M: mantle; R: rim.

## Sheet: S3-LA U-Pb
Table S3. LA-ICPMS zircon U-Pb data for Kfs-rich leucosomes and migmatites from the NDZ.
Spot No.	Domain	U	Th	Th/U	206Pb*	207Pb/206Pb	1σ	207Pb/235U	1σ	206Pb/238U	1σ	206Pb/238U age (Ma)	1σ
		ppm	ppm		ppm		%		%		%
1310YZH2-2 (Kfs-rich leucosome)
1.1	M	696	479	0.69	17	0.05931	9.7	0.1622	10.4	0.01984	3.6	127	5
2.1	C	151	49	0.32	4	0.04525	16.6	0.13261	17.2	0.02126	4.6	136	6
2.2	C	140	34	0.24	3	0.03985	16.8	0.11364	17.5	0.02068	5	132	7
3.3	C	301	102	0.34	7	0.04599	12.6	0.13244	13.3	0.02089	4.1	133	5
4.1	C	1457	383	0.26	33	0.04844	9	0.13623	9.6	0.0204	3.5	130	4
5.1	C	129	139	1.08	4	0.0423	18.3	0.12564	18.8	0.02154	4.6	137	6
6.1	C	546	136	0.25	13	0.04812	10.4	0.13791	11	0.02079	3.6	133	5
6.2	M	555	403	0.73	13	0.0489	10.5	0.12641	11.2	0.01875	4	120	5
7.1	M	895	837	0.93	24	0.04905	10.1	0.13679	10.7	0.02022	3.5	129	4
8.1	C	183	90	0.49	5	0.05383	12.5	0.15978	13.2	0.02153	4.3	137	6
9.1	C	349	142	0.41	8	0.0462	11.6	0.12974	12.2	0.02037	3.7	130	5
10.1	M	227	102	0.45	5	0.04716	15.4	0.12821	16.1	0.01972	4.6	126	6
11.1	R	330	290	0.88	8	0.04087	13.4	0.10108	14	0.01794	4.1	115	5
12.1	M	296	76	0.26	7	0.05525	12.8	0.15031	13.6	0.01973	4.6	126	6
13.1	M	2039	778	0.38	46	0.04874	8.1	0.13084	8.7	0.01947	3.3	124	4
14.1	C	560	182	0.32	14	0.05277	9.7	0.156	10.4	0.02144	3.6	137	5
14.2	M	297	113	0.38	6	0.04717	13.4	0.12181	14.1	0.01873	4.3	120	5
15.1	C	368	254	0.69	10	0.05185	11.4	0.15494	12.2	0.02167	4.2	138	6
15.2	M	3126	914	0.29	67	0.04954	8.3	0.12991	8.9	0.01902	3.4	121	4
16.1	R	651	415	0.64	15	0.05447	11.4	0.13296	12	0.0177	4	113	5
17.1	C	4446	64	0.01	95	0.05011	7.8	0.14138	8.4	0.02046	3.2	131	4
18.1	M	1213	889	0.73	30	0.05021	9	0.13496	9.7	0.0195	3.5	124	4
19.1	C	1921	34	0.02	41	0.05241	8.4	0.14912	9.1	0.02064	3.4	132	4
1310YZH7-4 (Kfs-rich leucosome)
1.1	M	176	610	3.47	13	0.05288	8	0.13764	8.5	0.01888	2.7	121	3
2.1	C	25	1857	74.66	44	0.06251	6.3	0.18284	6.7	0.02121	2.2	133	3
3.1	M	80	180	2.25	4	0.04822	12.1	0.13303	12.4	0.02001	3.1	128	4
3.2	C	103	270	2.63	6	0.04636	11.9	0.12993	12.2	0.02033	3	130	4
3.3	R	139	356	2.56	7	0.05548	12.4	0.12959	13.1	0.01694	4.3	108	5
4.1	M	51	150	2.95	3	0.05893	11.5	0.15413	12	0.01897	3.5	121	4
5.1	R	85	192	2.25	5	0.06147	16.9	0.1521	17.5	0.01795	4.5	115	5
5.2	R	117	294	2.51	6	0.056	15.9	0.1338	16.4	0.01733	3.9	111	4
5.2	M	118	346	2.92	8	0.04452	11.7	0.11751	12.1	0.01914	3.1	122	4
6.1	R	69	427	6.2	9	0.04885	9.3	0.1234	9.6	0.01832	2.5	117	3
7.1	M	146	470	3.22	9	0.05577	9.1	0.14774	9.5	0.01921	2.8	123	3
8.1	M	62	198	3.18	4	0.04597	11.7	0.11914	12.1	0.01879	3.4	120	4
9.1	M	115	300	2.61	7	0.053	9.6	0.14096	10.1	0.01929	3.1	123	4
9.2	C	99	191	1.93	5	0.05736	13.6	0.17152	14.2	0.02169	3.8	138	5
10.1	M	159	294	1.85	7	0.04359	9.2	0.11949	9.5	0.01988	2.7	127	3
11.1	C	118	270	2.29	7	0.04655	10.4	0.13462	10.8	0.02098	3	134	4
11.2	M	102	317	3.12	7	0.04344	9.8	0.11563	10.3	0.0193	2.9	123	4
12.1	M	189	327	1.73	8	0.05473	9.8	0.14622	10.4	0.01938	3.6	124	4
13.1	M	123	322	2.63	7	0.04889	13.8	0.13298	14.4	0.01973	4.1	126	5
13.2	R	127	788	6.19	18	0.04927	8.1	0.12142	8.6	0.01787	2.8	114	3
14.1	C	127	251	1.98	6	0.04733	22.1	0.14262	22.4	0.02186	4.1	139	6
15.1	M	91	296	3.26	6	0.0415	10.8	0.11176	11.2	0.01953	2.9	125	4
16.1	C	170	491	2.89	12	0.04901	10.2	0.14388	10.6	0.02129	3	136	4
16.2	R	53	187	3.51	4	0.0445	12.3	0.11274	13	0.01838	4.4	117	5
17.1	C	100	271	2.72	7	0.06193	13.4	0.17524	14.1	0.02052	4.2	131	5
1410BJ1-2 (Melanocratic migmatite)
1.1	M2	366	14	0.04	13	0.05182	8.5	0.23687	8.9	0.03315	2.5	210	5
2.1	M4	171	25	0.15	5	0.04924	17.3	0.18451	17.7	0.02718	3.8	173	6
3.1	M2	186	17	0.09	6	0.04569	13.6	0.20619	14	0.03273	3.4	208	7
4.1	C	123	165	1.35	13	0.05997	11.5	0.55466	11.9	0.06708	3.2	419	13
5.1	M3	177	11	0.06	6	0.05073	13	0.20767	13.6	0.02969	4.1	189	8
6.1	M3	673	44	0.07	21	0.05403	9	0.22174	9.4	0.02977	2.7	189	5
7.1	M2	320	37	0.12	11	0.05322	13.9	0.2397	14.3	0.03267	3.3	207	7
8.1	M4	149	35	0.24	4	0.04778	17.5	0.17493	18	0.02655	4.5	169	7
8.2	M4	86	32	0.37	3	0.06198	18.6	0.23836	19.3	0.02789	4.9	177	9
8.3	M4	78	28	0.36	2	0.02428	26.2	0.09081	26.7	0.02713	4.9	173	8
9.1	M1	300	28	0.09	11	0.04935	12.7	0.24039	13.1	0.03533	3.2	224	7
9.2	M4	141	40	0.28	4	0.05487	13.8	0.19828	14.3	0.02621	3.7	167	6
9.3	R	386	90	0.23	9	0.05002	13.8	0.1444	14.2	0.02094	3.2	134	4
10.1	M3	540	40	0.07	17	0.05449	9.1	0.22507	9.5	0.02996	2.6	190	5
10.2	M3	231	6	0.03	7	0.05074	10.6	0.21125	11	0.0302	3.1	192	6
11.1	M1	396	193	0.49	18	0.05586	12.1	0.27315	12.4	0.03547	3	225	7
12.1	C	166	68	0.41	15	0.06776	13.1	0.67239	13.5	0.07197	3.2	448	14
12.2	M1	339	11	0.03	13	0.05775	9.2	0.27742	9.5	0.03484	2.5	221	5
13.1	M3	634	4	0.01	21	0.05818	9.7	0.24641	10.1	0.03072	2.8	195	5
13.1	M2	659	16	0.02	22	0.0479	8.7	0.21217	9.1	0.03212	2.4	204	5
14.1	M2	243	22	0.09	8	0.05748	10.6	0.25443	11	0.0321	2.9	204	6
15.1	M1	347	128	0.37	14	0.05327	9	0.25728	9.4	0.03503	2.6	222	6
16.1	M3	231	6	0.02	7	0.06221	11	0.25935	11.5	0.03024	3.3	192	6
17.1	M4	596	35	0.06	16	0.0512	8.8	0.17643	9.1	0.02499	2.4	159	4
18.1	C	103	42	0.41	9	0.05897	12.2	0.55461	12.7	0.06821	3.6	425	15
1410LTSP1 (Melanocratic migmatite)
1.1	C	224	60	0.27	26	0.06714	8.5	0.95681	9.4	0.10336	4	634	24
2.1	C	220	274	1.25	39	0.06352	8.2	1.05128	9	0.12003	3.6	731	25
3.1	C	369	157	0.43	51	0.06466	7.5	1.04072	8.3	0.11674	3.5	712	24
4.1	C	52	35	0.69	8	0.04918	14.5	0.7998	15.2	0.11794	4.6	719	31
5.1	C	144	87	0.61	15	0.06849	9.7	0.78446	10.5	0.08307	4	514	20
5.1	C	303	432	1.43	49	0.06727	8.5	0.98472	9.3	0.10616	3.8	650	23
6.1	R	98	98	1	13	0.05548	16.5	0.14059	17.5	0.01838	5.9	117	7
7.1	C	181	149	0.83	27	0.06854	8.3	1.09569	9.1	0.11593	3.8	707	26
8.1	C	256	306	1.19	43	0.06744	7.9	1.07463	8.7	0.11556	3.5	705	24
8.2	C	167	174	1.04	27	0.06471	7.9	1.03621	8.6	0.11613	3.6	708	24
9.1	C	379	592	1.56	77	0.06811	7.9	1.22526	8.7	0.13047	3.5	791	26
10.1	C	221	150	0.68	26	0.07044	10.7	0.84914	11.4	0.08743	3.9	540	20
11.1	C	118	51	0.43	13	0.06693	10	0.86928	10.7	0.09419	3.9	580	22
12.1	C	266	289	1.09	48	0.06759	7.2	1.21486	8	0.13037	3.5	790	26
13.1	C	148	152	1.03	23	0.05939	8.7	0.92087	9.6	0.11245	3.9	687	25
14.1	C	192	197	1.03	29	0.06655	8	1.01714	8.8	0.11085	3.6	678	23
15.1	C	97	138	1.42	19	0.0678	12.3	1.23478	13	0.13208	4.2	800	32
15.2	C	55	28	0.51	8	0.07567	12.2	1.24978	13	0.11978	4.6	729	32
16.1	C	289	261	0.91	50	0.06062	7.7	1.06043	8.5	0.12688	3.5	770	26
1410MSH2-1 (Melanocratic migmatite)
1.1	M2	302	49	0.16	7	0.05099	12.8	0.14358	13.4	0.02042	4.2	130	5
1.2	M2	408	107	0.26	10	0.0624	9.7	0.17366	10.3	0.02018	3.4	129	4
2.1	M2	1417	790	0.56	34	0.04939	6.1	0.12942	6.6	0.019	2.3	121	3
3.1	M3	331	134	0.4	7	0.04785	11.7	0.12076	12.2	0.01831	3.5	117	4
6.1	M3	451	213	0.47	10	0.04787	12.8	0.11994	13.2	0.01817	3.3	116	4
6.1	M2	328	61	0.19	7	0.05527	9.6	0.15116	10	0.01983	2.9	127	4
7.1	M2	1159	695	0.6	29	0.04988	6.4	0.13335	6.8	0.01939	2.3	124	3
8.1	C2	61	12	0.2	2	0.03589	28.9	0.16977	29.4	0.0343	5.7	217	12
9.1	M3	1005	444	0.44	23	0.04919	9.5	0.12512	9.8	0.01845	2.5	118	3
10.1	M1	436	134	0.31	11	0.04298	10.6	0.12803	10.9	0.02161	2.8	138	4
11.1	C1	78	60	0.77	8	0.06296	12.2	0.70436	12.8	0.08113	4	503	19
12.1	R	751	275	0.37	15	0.05498	8.1	0.12939	8.5	0.01707	2.7	109	3
12.1	M2	736	388	0.53	18	0.05372	9.6	0.14861	10	0.02006	2.8	128	4
13.1	M2	1047	657	0.63	26	0.04844	8.1	0.1315	8.5	0.01969	2.4	126	3
14.1	M2	950	438	0.46	23	0.04405	7.1	0.12055	7.5	0.01985	2.4	127	3
15.1	C1	1556	113	0.07	111	0.05951	5.6	0.52595	6.1	0.0641	2.3	400	9
16.1	M1	247	21	0.09	6	0.03922	13.7	0.11351	14.2	0.02099	3.5	134	5
17.1	C1	144	71	0.49	14	0.06333	11.4	0.63581	11.8	0.07281	3.2	453	14
18.1	C1	99	120	1.22	14	0.06008	10.5	0.72913	11.1	0.08802	3.6	544	19
19.1	M2	94	53	0.57	3	0.08182	15.9	0.22623	16.7	0.02005	5.2	128	7
20.1	M2	131	86	0.66	3	0.05717	13.7	0.15143	14.3	0.01921	3.9	123	5
21.1	M3	495	66	0.13	10	0.05182	11.8	0.13184	12.2	0.01845	3.2	118	4
21.2	C1	197	33	0.17	13	0.06065	8.8	0.47852	9.3	0.05722	2.9	359	10
22.1	M2	252	75	0.3	6	0.04357	10.9	0.11933	11.3	0.01986	2.9	127	4
Pb*: radiogenic lead portion; C: core; M: mantle; R: rim.

## Sheet: S4-Sr-Nd-Pb
Table S4. Sr-Nd-Pb isotopic compositions of four types of various leucosomes and melanosomes in stromatic migmatites in the NDZ.
Type	Grt-bearing leucosome		Amp-rich leucosome						Amp-poor leucosome		Amp-poor leucosome		Kfs-bearing leucosome		Melanosome						Leucocratic migmatite		Melanocratic migmatite
Sample	1310YZH1-1	1310YZH6-1	1410BJ1-4	1410BJ2-2	1410MSH2-3	1410YZH1	1410YZH3	1505LNA2-1	1310YZH6-2	1310YZH6-3	1410BJ1-1	1410LTSP2	1310YZH7-4	1410MSH1-3	1310YZH1-3	1310YZH4	1410MSH2-4	1505LNA2-2	1505XPG3-1	1505MSH1	1410MSH1-1	1410MSH2-2	1310YZH1-2	1410BJ1-2	1410BJ1-3	1410BJ2-1	1410MSH2-1	1410YZH2	1410LTSP1
Rb(ppm)	26.15	110.87	87.76	109.23	11.62	60.55	62.59	37.34	86.34	86.18	54.33	85.4	64.78	47.79	95.88	29.33	19.83	30.19	42.89	51.93	33.13	39.61	85.99	50.33	90.66	50.85	17.77	60.39	70.09
Sr(ppm)	97.38	227.22	247.13	110.9	189.95	191.14	247.75	583.47	187.86	632.67	207.39	637.3	481.07	490.58	468.2	480.32	340.38	419.87	404.23	753.11	453.33	327.89	364.39	202.78	294.18	125.23	290.4	359.97	402.68
87Rb/86Sr	0.777962	1.41234	1.02784	2.85077	0.17695	0.917263	0.73118	0.185162	1.33096	0.394117	0.758274	0.387872	0.389684	0.281865	0.592583	0.176735	0.168508	0.208018	0.307028	0.199532	0.211425	0.349559	0.683168	0.718409	0.891981	1.17531	0.177037	0.485509	0.50379
87Sr/86Sr	0.721046	0.712371	0.71173	0.711537	0.708648	0.716002	0.712042	0.708098	0.716824	0.708398	0.712149	0.712509	0.709542	0.707969	0.709528	0.709761	0.70693	0.708504	0.708867	0.70933	0.708126	0.708949	0.713476	0.711948	0.711637	0.712655	0.707755	0.710371	0.711191
2σ	1.2e-05	1.4e-05	1.4e-05	1.4e-05	1.2e-05	1.4e-05	1.3e-05	1.3e-05	1.3e-05	1.4e-05	1.4e-05	1.4e-05	1.4e-05	1.3e-05	1.3e-05	1.4e-05	1.4e-05	1.4e-05	1.4e-05	1.3e-05	1.4e-05	1.3e-05	1.4e-05	1.3e-05	1.3e-05	1.4e-05	1.3e-05	1.4e-05	1.3e-05
87Sr/86Sri	0.719609	0.709762	0.709831	0.70627	0.708321	0.714307	0.710691	0.707755	0.714364	0.70767	0.710747	0.711792	0.708822	0.707448	0.708433	0.709434	0.706619	0.70812	0.708299	0.708962	0.707735	0.708303	0.712214	0.71062	0.709989	0.710484	0.707428	0.709474	0.71026
Sm(ppm)	11.1	10.45	4.91	6.38	2.03	8.44	7.22	1.54	2.4	2.5	3.5	4.88	0.16	0.36	2.4	4.97	5.49	3.33	13.13	11.99	1.31	3.36	14.12	5.05	3.68	3.51	3.95	7.64	10.54
Nd(ppm)	56.1	65.82	20.78	39.51	10.32	46.69	33.57	10.98	15.17	15.62	25.37	34.32	1.12	2.63	10.44	25.09	23.82	15.14	47.57	63.46	8.5	22.9	81.12	24.39	14.45	13.25	17.04	39.85	65.98
147Sm/144Nd	0.119629	0.095974	0.142957	0.097598	0.118694	0.109323	0.129941	0.084891	0.095731	0.096602	0.083412	0.085905	0.086069	0.082096	0.138926	0.11965	0.139328	0.132848	0.166899	0.114243	0.093549	0.088679	0.10521	0.125128	0.153895	0.160342	0.140069	0.115845	0.096538
143Nd/144Nd	0.511934	0.511284	0.512003	0.511432	0.512096	0.511892	0.511846	0.511639	0.511649	0.511479	0.512214	0.511531	0.511401	0.511779	0.511991	0.511676	0.512268	0.511702	0.511618	0.511772	0.511758	0.511935	0.511763	0.512245	0.511935	0.511788	0.512201	0.511736	0.511671
2σ	1e-05	1.3e-05	1.1e-05	9e-06	1.2e-05	1.7e-05	1e-05	9e-06	9e-06	1.2e-05	9e-06	9e-06	1.2e-05	1.4e-05	1.8e-05	8e-06	1.2e-05	1.1e-05	1e-05	1.1e-05	1e-05	1.2e-05	1.3e-05	1e-05	1e-05	1.8e-05	1.4e-05	9e-06	1.2e-05
εNd(t)	-12.46	-24.76	-11.51	-21.89	-9.28	-13.11	-14.36	-17.63	-17.61	-20.95	-6.39	-19.76	-22.3	-14.86	-11.68	-17.5	-6.26	-17.2	-19.41	-15.55	-15.45	-11.92	-15.55	-6.47	-13.01	-15.98	-7.58	-16.25	-17.2
T2DM	1936	2928	1859	2698	1679	1989	2090	2354	2353	2622	1445	2526	2730	2130	1873	2344	1434	2320	2497	2185	2179	1893	2186	1452	1981	2221	1542	2243	2320
206Pb/204Pb	20.0695	15.8161	16.4991	16.572	16.5839	16.8094	16.7676	16.2929	16.2763	16.1319	16.5992	17.3334	16.5993	16.3824	17.6231	16.7758	16.8594	16.3292	16.1715	16.7736	16.4253	16.6125	17.8126	16.565	16.5471	16.6312	16.6885	16.7071	16.9698
2σ(%)	0.006	0.008	0.012	0.007	0.007	0.007	0.005	0.007	0.008	0.007	0.008	0.008	0.008	0.008	0.01	0.009	0.006	0.004	0.007	0.007	0.009	0.006	0.009	0.004	0.005	0.014	0.012	0.009	0.006
207Pb/204Pb	15.6919	15.2836	15.3075	15.3312	15.3256	15.3779	15.3611	15.3555	15.3476	15.3187	15.3576	15.5199	15.3398	15.2951	15.5493	15.4755	15.3709	15.3548	15.3522	15.3866	15.296	15.3407	15.5287	15.3264	15.3444	15.3826	15.3273	15.3588	15.4781
2σ(%)	0.006	0.008	0.013	0.007	0.01	0.009	0.005	0.008	0.009	0.008	0.009	0.008	0.008	0.008	0.01	0.008	0.007	0.005	0.007	0.007	0.01	0.008	0.009	0.005	0.005	0.014	0.012	0.009	0.006
208Pb/204Pb	44.2205	37.0366	37.4334	37.761	37.4226	37.8337	37.8193	37.2631	37.3152	37.1413	37.5643	38.9267	37.4646	37.3344	38.5701	37.9873	37.4923	37.252	37.2274	37.8226	37.3398	37.5697	39.8201	37.4359	37.4866	37.5287	37.3896	37.7343	38.0333
2σ(%)	0.006	0.009	0.012	0.008	0.012	0.011	0.006	0.008	0.01	0.008	0.01	0.009	0.009	0.009	0.011	0.009	0.008	0.005	0.008	0.006	0.011	0.011	0.009	0.006	0.005	0.014	0.014	0.01	0.005
Note: The 87Sr/86Sri and εNd(t) values were calculated using t = 130 Ma as εNd(t) = [(143Nd/144Nd)sample/(143Nd/144Nd)CHUR-1]*10000 using (147Sm/143Nd)CHUR = 0.1967 and (143Nd/144Nd)CHUR = 0.512638; T2DM were calculated by using present-day (147Sm/143Nd)DM = 0.2137 and (143Sm/143Nd)DM = 0.51315.

## Sheet: S5-EMPA
Table S5. Electron microprobe analyses of representative minerals from various leucosomes in the NDZ.
Type	Grt-bearing leucosome
Sample	1310YZH1-1
Mineral	Grt	Grt	Grt	Grt	Grt	Grt	Grt	Grt	Grt	Amp	Amp	Pl	Pl	Kfs	Kfs
SiO2	38.19	37.39	37.73	37.44	37.86	37.68	37.83	37.46	37.67	40.22	40.53	67.05	68.09	63.89	63.97
TiO2	-	0.04	-	0.07	0.09	-	0.07	0.14	0.01	2	1.76	0.04	0.14	0.28	0.1
Al2O3	19.51	20.06	20.11	20.24	19.85	20.43	20.42	20.04	19.98	10.66	10.62	20.03	19.36	18.02	18.47
Cr2O3	0.02	0.03	0.07	0.04	0.02	0	0.01	0.01	0.01	0.01	0.01	-	-	-	-
FeO	26.68	29.72	29.62	29.51	29.68	29.45	29.24	29.39	29.1	22.53	22.23	0.31	0.04	0.02	0.07
MnO	5.36	2.24	2.29	2.31	2.11	2.13	2.07	2.18	2.97	0.27	0.26	-	0	-	0
MgO	2.15	2.56	2.63	2.66	2.65	2.68	2.65	2.52	2.52	6.78	6.85	-	0	-	-
CaO	7.92	8.4	8.01	7.83	8	8.01	8.23	8.62	7.93	11.02	11.04	0.8	0.32	0.02	0.06
Na2O	0.01	0.01	0.01	0.01	0.01	0.01	0	0.02	-	1.41	1.41	9.95	11.19	0.99	0.82
K2O	0	-	0	-	0.01	-	0	0.01	0.01	2.35	2.33	0.56	0.32	15.77	15.85
Total	99.85	100.44	100.46	100.1	100.28	100.38	100.52	100.4	100.2	97.3	97.1	98.74	99.47	98.99	99.33
Type	Grt-bearing leucosome						Amp-rich leucosome
Sample	1512LTSP4						1410BJ1-4
Mineral	Grt	Amp	Pl	Pl	Kfs	Kfs	Amp	Amp	Amp	Amp	Amp	Pl	Pl	Kfs	Kfs
SiO2	37.55	40.62	59.84	62.12	64.14	64.58	45.51	42.93	45.02	46.25	45.83	64.01	65.77	64.77	64.8
TiO2	-	1.63	-	-	-	0.24	1.53	2.25	1.33	1.26	1.24	0.1	0.01	0.26	0.07
Al2O3	19.62	10.47	23.53	22.98	17.97	18.05	7.08	8.67	6.16	6.55	6.69	22.41	21.24	18.02	18.33
Cr2O3	-	-	-	-	-	-	0.07	0.06	2.34	0.03	-	-	-	-	-
FeO	23.96	21.69	0.56	0.03	0.06	0.35	16.62	17.05	16.11	15.89	16.37	0.32	0.13	0.39	0.11
MnO	9.14	0.35	0.06	0	0.01	0.04	0.27	0.25	0.29	0.25	0.26	-	-	0.01	-
MgO	2.26	7.46	-	-	-	0	11.76	10.66	10.99	12.24	11.92	0.01	-	0	-
CaO	7.03	10.76	8.47	5.33	0.1	-	11.38	11.04	11.09	11.41	11.7	3.47	2.62	-	0.05
Na2O	0.02	1.63	7.25	8.22	1.44	0.68	1.46	1.67	1.18	1.42	1.5	9.47	9.95	0.09	1.32
K2O	-	2.11	0.17	0.26	15.2	16.16	1.35	1.85	1.17	1.18	1.24	0.29	0.16	17.1	15.06
Total	99.58	96.77	99.88	98.93	98.92	100.09	97.04	96.48	95.67	96.51	96.75	100.08	99.88	100.63	99.74
Type	Amp-rich leucosome			Amp-poor leucosome					Kfs-rich leucosome
Sample	1410YZH3			1410BJ1-1					1310YZH7-4
Mineral	Amp	Bt	Pl	Pl	Pl	Pl	Kfs	Kfs	Amp	Bt	Pl	Pl	Kfs	Kfs	Kfs
SiO2	42.98	36.56	63.38	65.05	63.58	64.57	64.32	63.82	41.7	36.51	66.05	65.55	64.66	64.68	63.88
TiO2	2.26	5.6	0.06	0.01	-	-	-	0.02	0.87	4.29	-	-	0.34	0.09	0.3
Al2O3	8.69	12.99	22.15	21.17	22.08	21.53	18.05	18.13	9.39	13.01	20.58	20.9	18.29	18.14	18.1
Cr2O3	0.13	0.16	-	-	-	-	-	-	0	0.01	-	-	-	-	-
FeO	17.08	19.9	0.25	-	0.16	0.03	0.19	-	22.84	21.67	0.07	0.08	0.06	0.13	0.15
MnO	0.22	0.12	0	0.01	0	0.02	-	0	0.05	0.23	0.01	0.01	-	-	0.01
MgO	10.96	12.78	0.01	0.02	0.01	-	-	-	7.25	11.17	-	-	0.01	0	-
CaO	11.41	-	4.01	2.89	4.38	3.13	0.02	0.05	11.57	-	3.33	2.18	0.07	0.06	0.06
Na2O	1.48	0.05	8.48	9.59	8.5	9.27	0.39	1.19	1.34	0.08	9.73	10.07	0.94	1.35	1.31
K2O	1.81	9.77	0.55	0.15	0.36	0.24	16.78	15.46	1.99	10.14	0.13	0.02	15.66	15.22	15.49
Total	97.06	98.33	99.88	99.88	99.06	98.78	99.74	98.68	97.28	97.49	99.89	98.8	100.01	99.67	99.3
